# Supplementary material for: What happens after they survive? The role of anticoagulants and antiplatelets in IVC injuries
Source: PubMed Central journal article supplement — Trauma Surg Acute Care Open. 2022 Jun 20;7(1):e000923. doi: 10.1136/tsaco-2022-000923 (PMC9214426; doi:10.1136/tsaco-2022-000923), 2022-06-20
Supplement: tsaco-2022-000923supp001.pdf [file tsaco-2022-000923supp001.pdf]

---

**SUPPLEMENTAL TABLE 1.** Examples of Duplex Screening Protocol Risk Categories.
 

---

**2008-2012**

## High-risk

Age >50  
 Injury Severity Score  $\geq$  16  
 Femoral central venous catheter in trauma resuscitation  
 AIS  $\geq$  3 (any body region)  
 GCS < 9  
 Pelvic Fracture  
 Femur/tibia fracture  
 Venous injury

## Very high-risk

Spinal cord injury  
 AIS (head and neck)  $\geq$  3 & long bone fracture (upper or lower)  
 Severe pelvic fracture (posterior element), and long bone fracture (upper or lower)  
 Multiple ( $\geq$  3) long bone fracture

---

**2017**

## Very high-risk

Spinal cord injury or paralysis  
 Severe traumatic brain injury  
 Stroke  
 Posterior pelvis + long bone fracture  
 $\geq$  3 long bone fractures  
 History of venous thromboembolism event

---

 AIS, Abbreviated Injury Scale; GCS, Glasgow Coma Scale
 

---

**SUPPLEMENTAL TABLE 2.** Description of Bleeding Events During Hospitalization.

| Pt | Description of the Bleeding Event                                                                                                                                                                                                                                                              |
|----|------------------------------------------------------------------------------------------------------------------------------------------------------------------------------------------------------------------------------------------------------------------------------------------------|
| 1  | HD 22,23 embolization proximal branch SMA OSHx2, HD 31 CRRT catheter removed, bled, transfused 3PRBC, 2FFP, DDAVP, HD 47 Large bilateral STSG donor sights oozy 4PRBC, 2 FFP, DDAVP+ 2 more overnight                                                                                          |
| 2  | Pt on prophylaxis (earlier had been on ASA) HD 14 received 2 units of PRBCs and DDAVP for bloody JP output (CTA-). HD 25 received 1 unit of PRBC for Hgb 6.8                                                                                                                                   |
| 3  | Heparin gtt since HD 1. HD 6 held heparin gtt until HD 10 for hemoglobin drifting from HD 3 from a hemoglobin of 9. HD 4 to 6, initiated prophylaxis & Aspirin 325. Received 1 unit total                                                                                                      |
| 6  | Prophylactic and ASA pt. Lumbar a coiled & psa artery embolization. HD 2 received 1 unit then intraoperatively during orthopedic bilateral ORIF received 2 units                                                                                                                               |
| 9  | HD 10 received 2 units of PRBCs. HD 21 2 units PRBCs. HD 27 2 units of PRBCs. HD 39 Marginal ulcer diagnosed. HD 48 2 units PRBCs. HD 54 2 units for diffuse bleeding from abdominal wound. HD 85 DDAVP and 2 units of PRBCs. HD 96 1 units of PRBCs.                                          |
| 11 | Gastrointestinal bleeding resulting in less than two units of product being transfused                                                                                                                                                                                                         |
| 16 | On HD 21 repeat ERCP with repositioning of stent. Upon removal of stent bleeding noted. Went to IR for embolization of GDA.                                                                                                                                                                    |
| 20 | Contemplating Heparin gtt on HD 2 however blood tinge output from PCN. Required 2u for Hgb of 6.9 on HD 3. Heparin gtt initiated HD 5 with the DVT then HD 8 2 units from bleeding from incision and HD 9-10 3 units for incisional bleeding (Heparin gtt held on HD 9). Filter obtained HD 10 |
| 24 | HD 15 1u PRBCs while on Heparin gtt for a hemoglobin of 6.9                                                                                                                                                                                                                                    |
| 26 | IVC-F patient who was on the floor. He had been on the Heparin gtt for HD 14-29 & developed a gastrointestinal bleed requiring one unit, full dose AC discontinued                                                                                                                             |

A, Artery; AC, Anticoagulation; ASA, Aspirin; CRRT, Continuous Renal Replacement Therapy; CTA, computed tomography angiography; DDAVP, Desmopressin; ERCP, Endoscopic Retrograde Cholangiopancreatography; FFP, Fresh Frozen Plasma; GDA, Gastroduodenal Artery; GTT, drip; HD, Hospital Day; Hgb, Hemoglobin; IVC-F, Inferior Vena Cava Filter; IR, Interventional Radiology; JP, Jackson-Pratt Drain; ORIF, Open Reduction and Internal Fixation; OSH, Outside Hospital; PCN, Percutaneous Nephrostomy; PRBC, Packed Red Blood Cell; PSA, Posterior Superior Alveolar; Pt, Patient; SMA, Superior Mesenteric Artery; STSG, Split Thickness Skin Graft

**SUPPLEMENTAL TABLE 3. Discharge Antithrombotic Regimens by Venous Thromboembolism Status.**

| Pt | VTE      | Discharge Antithrombotic Regimen                                                                                                                        |
|----|----------|---------------------------------------------------------------------------------------------------------------------------------------------------------|
| 1  | N/A      | Aspirin 81 mg daily (IVC filter patient)                                                                                                                |
| 2  | N/A      | Aspirin 81 mg daily                                                                                                                                     |
| 3  | N/A      | Apixaban completed 10 mg twice daily load followed by 5 mg twice daily                                                                                  |
| 4  | N/A      | None                                                                                                                                                    |
| 5  | N/A      | Dabigatran 150 mg twice daily                                                                                                                           |
| 6  | N/A      | Aspirin 81 mg daily and Effient 10 mg daily (home medications)                                                                                          |
| 7  | N/A      | Aspirin 81 mg daily                                                                                                                                     |
| 8  | N/A      | None                                                                                                                                                    |
| 9  | N/A      | Heparin 5000 units three times daily                                                                                                                    |
| 10 | N/A      | Aspirin 325 mg daily                                                                                                                                    |
| 11 | N/A      | None                                                                                                                                                    |
| 12 | N/A      | Aspirin 325 mg daily                                                                                                                                    |
| 13 | N/A      | None                                                                                                                                                    |
| 14 | N/A      | None                                                                                                                                                    |
| 15 | N/A      | None                                                                                                                                                    |
| 16 | N/A      | Aspirin 325 mg daily                                                                                                                                    |
| 17 | DVT      | Rivaroxaban completed 15 mg twice daily load followed by 20 mg once daily                                                                               |
| 18 | N/A      | Enoxaparin 100 mg daily                                                                                                                                 |
| 19 | DVT & PE | Enoxaparin 120 mg twice daily                                                                                                                           |
| 20 | DVT      | None (IVC filter patient)                                                                                                                               |
| 21 | PE       | Apixaban 10 mg twice daily load followed by 5 mg twice daily                                                                                            |
| 22 | DVT      | None (IVC filter patient)                                                                                                                               |
| 23 | DVT & PE | Enoxaparin 100 mg twice daily bridge with Coumadin 7.5 mg (IVC filter patient, removed during the same admission)                                       |
| 24 | DVT      | Coumadin 2.5 mg daily                                                                                                                                   |
| 25 | DVT      | Coumadin 7.5 mg daily with Aspirin 81 mg daily                                                                                                          |
| 26 | DVT & PE | None (IVC filter patient, who required one unit of blood on the floor for a gastrointestinal bleed that resulted in stopping the antithrombotic agents) |

DVT, Deep Venous Thrombosis; IVC, Inferior Vena Cava; mg, milligrams; N/A, Not Applicable; PE, Pulmonary Embolism; PT, Patient; VTE, Venous Thromboembolism
