# Supplementary figures and images for: What happens after they survive? The role of anticoagulants and antiplatelets in IVC injuries
Source: PubMed Central journal article supplement — Trauma Surg Acute Care Open. 2022 Jun 20;7(1):e000923. doi: 10.1136/tsaco-2022-000923 (PMC9214426; doi:10.1136/tsaco-2022-000923), 2022-06-20

## Supplemental Figure 1

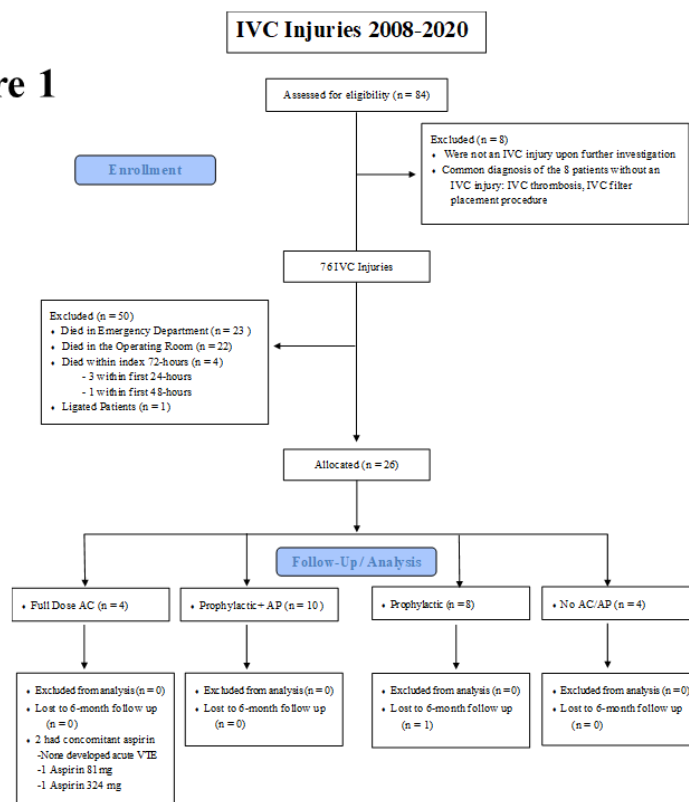

Supplement: tsaco-2022-000923supp003.pdf [file tsaco-2022-000923supp003.pdf]
